1 **Genome-wide association study, replication, and mega-analysis using a dense marker**  
2 **panel in a multi-generational mouse advanced intercross line**

3

4 Xinzhu Zhou<sup>1</sup>, Celine L. St. Pierre<sup>2</sup>, Natalia M. Gonzales<sup>3</sup>, Riyan Cheng<sup>4</sup>, Apurva Chitre<sup>4</sup>, Greta  
5 Sokoloff<sup>5</sup>, Abraham A. Palmer<sup>4,6\*</sup>

6

7 <sup>1</sup> Biomedical Sciences Graduate Program, University of California San Diego, La Jolla, CA,  
8 USA;

9 <sup>2</sup> Department of Genetics, Washington University School of Medicine, St. Louis, MO, USA

10 <sup>3</sup> Department of Human Genetics, University of Chicago, Chicago, IL, USA

11 <sup>4</sup> Department of Psychiatry, University of California San Diego, La Jolla, CA, USA

12 <sup>5</sup> Department of Psychological & Brain Sciences, University of Iowa, Iowa City, IO, USA

13 <sup>6</sup> Institute for Genomic Medicine, University of California San Diego, La Jolla, CA, USA

14

15 \*Corresponding author

16 Email: [aapalmer@ucsd.edu](mailto:aapalmer@ucsd.edu) (AAP)

17

18

19 **Author contributions**

20 XZ imputed genotypes, performed SNP and individual QC, and conducted GWAS in F<sub>34</sub> and F<sub>39-</sub>  
21 <sub>43</sub> AILs under supervision of AAP. AAP also provided computational resources for the analyses  
22 in this paper. CS prepared GBS libraries for sequencing, as well as organizing portions of the  
23 F<sub>39-43</sub> phenotypes. NMG de-multiplexed GBS sequencing results and performed alignment and  
24 variant calling. RC helped with kinship relatedness matrix calculated from AIL pedigree. AC  
25 provided technical support for running programs and scripts. GS collected F<sub>39-43</sub> phenotypes,  
26 respectively. XZ co-wrote the manuscript with AAP, who designed the study and oversaw data  
27 collection.

28

29 **Data Availability**

30 All relevant data are within the paper and its Supporting Information files. The GeneNetwork  
31 accession numbers for genotypes and phenotypes of F<sub>34</sub>, F<sub>39-43</sub>, and mega-analysis cohort of  
32 AIL are currently pending but will be secured prior to final acceptance/publication.

## 33 **Abstract**

34           Genome-wide association studies (**GWAS**) in multigenerational outbred populations  
35 offer improved mapping precision compared to traditional populations such as  $F_{2s}$ . Advanced  
36 intercross lines (**AILs**) are the simplest possible multigenerational intercross; AILs are produced  
37 by crossing two inbred strains and then breeding unrelated offspring for additional generations.  
38 New recombinations accumulate with each successive generation; these new recombinations  
39 provide increased mapping resolution. We used genotyping-by-sequencing (**GBS**) to re-  
40 genotype a cohort of sparsely genotyped  $F_{34}$  LG/J x SM/J AIL mice that were the subject of  
41 several prior publications as well as to obtain genotypes for new cohort of AIL mice from the  $F_{39-}$   
42  $_{43}$  generations. The denser set of GBS markers allowed us to identify 110 significant loci, 36 of  
43 which were novel, for 79 behavioral and physiological traits in the 428  $F_{34}$  mice. Genetic  
44 correlations between  $F_{34}$  and  $F_{39-43}$  were high, though  $F_{39-43}$  AILs showed systematically lower  
45 SNP-heritability estimates. We explored replication of loci identified in either  $F_{34}$  or  $F_{39-43}$  in the  
46 other cohort for the traits measured in both  $F_{34}$  and  $F_{39-43}$ : locomotor activity, body weight, and  
47 coat color. While coat color loci were robustly replicated, we observed only partial replication of  
48 associations for locomotor activity and body weight. We then performed a mega-analysis of  
49 locomotor activity, body weight by combining  $F_{34}$  and  $F_{39-43}$  mice (N=1028), which identified four  
50 novel loci. Finally, we showed that imputation using the old, sparse marker set and the newer  
51 dense marker set had little impact on our results, emphasizing the need of the denser GBS  
52 genotypes. The present study provides empirical insights into replication, the utility of denser  
53 genotyping and identifies new candidate loci that can be explored in future studies.

54

## 55 **Author summary**

56 Using a sufficiently dense marker set is essential for genome-wide association studies. The  
57 required SNP density is a function of population history. When considering populations derived  
58 from a cross between two or more inbred strains, more recombinations will require a  
59 correspondingly greater number of markers. We performed several genome-wide association  
60 studies using different marker sets - sparse SNPs from a previously published dataset, dense  
61 SNPs obtained using genotyping-by-sequencing, and imputed versions of both the sparse and  
62 dense SNPs - to compare their association results in 34<sup>th</sup> and 39-43<sup>rd</sup> generations of an LG/J x  
63 SM/J advanced intercross line (**AIL**). We found that the dense SNP set substantially increased  
64 the number of significant results, while the imputed sets did not. To achieve maximum power,  
65 we performed a mega-analysis using all the mice and the dense SNP set; this analysis identified  
66 several novel loci. Finally, we explored the replicability of associated loci discovered in either  
67 cohort by examining the same SNP in the other cohort. We have made these data publicly  
68 available on [www.genenetwork.org](http://www.genenetwork.org), providing the community with a unique reference dataset.

69

## 70 Introduction

71 The use of multi-parental crosses and commercially available outbred populations for  
72 genome wide association studies (**GWAS**) in model organisms such as mice [1–17], rats [18],  
73 chickens [19,20], zebrafish [21,22], fruit flies [23–27], *C. elegans* [28] and various plant species  
74 [29–31] has become increasingly popular over the last decade. These mapping populations can  
75 further be categorized as multi-parental crosses, which are created by interbreeding two or  
76 more inbred strains, and commercially available outbred populations, in which the founders are  
77 of unknown provenance. An  $F_2$  cross between two inbred strains is the prototypical mapping  
78 population; however,  $F_2$ s provide poor mapping resolution [32]. To improve mapping resolution,  
79 Darvasi and Soller [33] proposed the creation of advanced intercross lines (**AILs**), which are  
80 produced by intercrossing  $F_2$  mice for additional generations. AILs accumulate additional  
81 crossovers with every successive generation, leading to a population with shorter linkage  
82 disequilibrium (**LD**) blocks, which improves mapping precision, albeit at the expense of power  
83 [32,34].

84 The longest running mouse AIL was generated by crossing LG/J and SM/J inbred  
85 strains, which were selectively bred for large and small body size. We obtained this AIL in 2006  
86 at generation 33 from Dr. James Cheverud (Jmc: LG,SM-G<sub>33</sub>, Washington University in St.  
87 Louis). Since then, we have collected genotype and phenotype information from multiple  
88 generations, including  $F_{34}$  [16,35–38],  $F_{39}$ - $F_{43}$  and  $F_{50-56}$  [39]. Our previous publications using the  
89  $F_{34}$  generation used a custom Illumina Infinium genotyping microarray to obtain genotypes for  
90 4,593 SNPs [35,36]. Although not previously published, we also collected phenotype information  
91 from the  $F_{39}$ - $F_{43}$  generations, including body weight, fear conditioning, locomotor activity in  
92 response to methamphetamine, and the light dark test for anxiety.

93 In the present study, we used genotyping-by-sequencing (**GBS**), which is a reduced-  
94 representation sequencing method [40–42], to obtain a much denser set of SNPs in the  $F_{34}$  and  
95 to genotype mice from the  $F_{39}$ - $F_{43}$  generations for the first time. With this denser set of SNPs,  
96 we attempted to identify novel loci in the  $F_{34}$ s that were not detected using the sparse SNPs. We  
97 also performed a GWAS on using the mice from the  $F_{39}$ - $F_{43}$  AILs. Because  $F_{39}$ - $F_{43}$  AILs are  
98 descendants of the  $F_{34}$ , they are uniquely suited to be a replication population for GWAS in the  
99  $F_{34}$  generation. Moreover,  $F_{39}$ - $F_{43}$  may provide improved resolution and allow for the discovery  
100 of novel loci not detected in the  $F_{34}$  generation. We also performed a mega-analysis of  $F_{34}$  mice  
101 and  $F_{39}$ - $F_{43}$  mice to identify loci that were not identified in either individual dataset. Finally, we  
102 explored whether imputation from the array SNPs could have provided the additional coverage  
103 we obtained using the denser GBS genotypes. This study investigates the effect of SNP density  
104 on association analyses, addresses rarely explored questions about replication in outbred  
105 rodent populations, and identifies novel loci associated with a range of physiological and  
106 behavioral traits in mice.

107

## 108 **Results**

109 We used 214 males and 214 females from generation  $F_{34}$  (Aap:LG,SM-G34) and 305  
110 males and 295 females from generations  $F_{39-43}$ . We performed association studies on 79 traits in  
111  $F_{34}$  AIL and 49 traits in  $F_{39-43}$  AIL (S1 Table).  $F_{34}$  mice had been previously genotyped on a  
112 custom SNP array [35,36]. The average minor allele frequency (**MAF**) of those 4,593 array  
113 SNPs was 0.388 (Fig 1). To obtain a denser set of SNP markers, we used genotyping-by-  
114 sequencing in  $F_{34}$  and  $F_{39-43}$  AIL mice. Since data about the  $F_{39-43}$  AIL mice had been collected  
115 over the span of approximately two years, we carefully considered the possibility of sample  
116 contamination and sample mislabeling [43]. We removed samples based on four major features:

117 heterozygosity distribution, number of reads aligned to sex chromosomes, discrepancies  
118 between pedigree and genetic kinship relatedness, and coat color genotype to phenotype  
119 mismatch (see Methods; S1 and S2 Figs). The final SNP sets included 60,392 GBS-derived  
120 SNPs in 428 F<sub>34</sub> AIL mice, 59,790 GBS-derived SNPs in 600 F<sub>39-43</sub> AIL mice, and 58,461 GBS-  
121 derived SNPs that existed in both F<sub>34</sub> and F<sub>39-43</sub> AIL mice (S2 Table). The MAF for the GBS  
122 SNPs was 0.382 in F<sub>34</sub>, 0.358 in F<sub>39-43</sub>, and 0.370 in F<sub>34</sub> and F<sub>39-43</sub> (Fig 1). There were 66 SNPs  
123 called from our GBS data that were also present on the genotyping array. The genotype  
124 concordance rate, which reflects the sum of errors from both sets of genotypes, was 95.4% (S3  
125 Fig). We found that LD decay rates using F<sub>34</sub> array, F<sub>34</sub> GBS, F<sub>39-43</sub> GBS, and F<sub>34</sub> and F<sub>39-43</sub> GBS  
126 genotypes were generally similar to one another, though levels of LD using the GBS genotypes  
127 appear to be slightly reduced in the later generations of AILs (S4 Fig).

128

## 129 **GBS genotypes produced more significant associations than array genotypes in**

### 130 **F<sub>34</sub>**

131 We used a linear mixed model (**LMM**) as implemented in GEMMA [44] to perform  
132 GWAS. We used the leave-one-chromosome-out (**LOCO**) approach to address the problem of  
133 proximal contamination, as previously described [39,45–47]. We performed GWAS using both  
134 the sparse array SNPs and the dense GBS SNPs to determine whether additional SNPs would  
135 produce additional genome-wide significant associations. Autosomal and X chromosome SNPs  
136 were included in all GWAS. We obtained adjusted significance threshold for each SNP set using  
137 MultiTrans and SLIDES [48,49]. To select independently associated loci (“lead loci”), we used a  
138 LD-based clumping method implemented in PLINK to group SNPs that passed the adjusted  
139 genome-wide significance thresholds over a large genomic region flanking the index SNP [50].  
140 Applying the most stringent clumping parameters ( $r^2 = 0.1$  and sliding window size = 12,150kb,  
141 S3 Table), we identified 110 significant lead loci in 49 out of 79 F<sub>34</sub> phenotypes using the GBS

142 SNPs. In contrast, we identified 83 significant lead loci in 45 out of 79  $F_{34}$  phenotypes using the  
143 sparse array SNPs. Among  $F_{34}$  lead loci, 36 were uniquely identified in the GBS GWAS,  
144 whereas 11 were unique to the array GWAS. GBS SNPs consistently yielded more significant  
145 lead loci compared to array SNPs regardless of the clumping parameter values (S3 Table),  
146 indicating that a dense marker panel was able to detect more association signals compared to a  
147 sparse marker panel. Significant lead loci in  $F_{34}$  GBS and array are summarized in Table S4.

148 We considered whether the disparity between the numbers of loci identified by the two  
149 SNP sets could be resolved by imputation. We used LG/J and SM/J whole genome sequencing  
150 data as reference panels [51] and performed imputation on array and GBS SNPs using Beagle  
151 v4.1 [52]. After QC filtering, we obtained 4.3M SNPs imputed from the array SNPs and 4.1M  
152 SNPs imputed from the GBS SNPs. More imputed GBS SNPs were filtered out because GBS  
153 SNPs were called from genotype probabilities, thus introducing uncertainty in imputed SNPs.  
154 We found that imputed array genotypes and imputed GBS genotypes did not meaningfully  
155 increase the number of new loci discoveries (Fig S5), indicating that the greater number of  
156 genome-wide significant associations obtained using the GBS SNPs could not be overcome by  
157 imputation.

158 Under a polygenic model where a large number of additive common variants contribute  
159 to a complex trait, heritability estimates could be higher when more SNPs are considered [53].  
160 Given that there were more GBS SNPs than array SNPs, we used autosomal SNPs to examine  
161 whether GBS SNPs would generate higher SNP heritability estimates compared to the sparse  
162 array SNPs. Heritability estimates were similar for the two SNP sets, with the exception of  
163 agouti coat color, which showed marginally greater heritability for the GBS SNPs (S6 Fig; S5  
164 Table). Our results show that while the denser GBS SNP set was able to identify more genome-  
165 wide significant loci, greater SNP density did not improve the polygenic signal.

## 166 **Genetic correlation and SNP heritability of traits in F<sub>34</sub> and F<sub>39-43</sub>**

167 One goal of collecting phenotypic information in the F<sub>39-43</sub> generations was to evaluate  
168 whether or not the genetic signal driving the phenotypes are consistent across cohorts. To this  
169 end, we used two approaches to evaluate replication between F<sub>34</sub> and F<sub>39-43</sub>. First, we used  
170 autosomal SNPs to calculate genetic correlations between the F<sub>34</sub> and F<sub>39-43</sub> generations for  
171 body weight, coat color, and locomotor activity phenotypes (S6 Table). Locomotor activity on  
172 days 1 and 2, albino and agouti coat color, and body weight were highly genetically correlated  
173 ( $r_G > 0.7$ ). In contrast, locomotor activity on day 3 showed a significant but weaker genetic  
174 correlation ( $r_G = 0.577$ ), perhaps reflecting variability in the quality of the methamphetamine  
175 injection, which was not given on days 1 and 2. Overall, these results suggest that genetic  
176 influences on these traits were broadly similar in the two cohorts. Despite the relatively robust  
177 genetic correlations, SNP heritability was consistently lower in the F<sub>39-43</sub> compared to the F<sub>34</sub>,  
178 possibly a result of increased experimental variance introduced by our extended phenotype  
179 collection period (Fig 2; S7 Table).

180

## 181 **Replication of loci detected in F<sub>34</sub> using F<sub>39-43</sub>**

182 Using the dense GBS SNP set, we identified 27 genome-wide significant loci in 21 out of  
183 49 F<sub>39-43</sub> phenotypes. A subset of those traits, including coat color, body weight, and locomotor  
184 activity, were also phenotyped in the F<sub>34</sub> AILs (S8 Table). To assess replication, we determined  
185 whether loci that were significant in one cohort (either F<sub>34</sub> or F<sub>39-43</sub>) would also be significant in  
186 the other. We termed the cohort in which a locus was initially discovered as its “discovery set”  
187 and the cohort we attempted replication in as the “replication set” (Table 1). Coat color  
188 phenotypes (both albino and agouti) are Mendelian traits and thus served as positive control. As  
189 expected, all body weight loci replicated. All three body weight loci identified in the F<sub>34</sub> were



190 replicated at nominal levels of significance ( $p < 0.05$ ) in  $F_{39-43}$ ; similarly, the only body weight  
191 locus identified in  $F_{39-43}$  was replicated in  $F_{34}$ . However, none of the five locomotor activity  
192 associated loci were replicated in the reciprocal (replication) cohorts. We also used the “sign  
193 test” to determine whether the directions of the effect (beta) of the loci were in the same  
194 direction between the discovery and replication cohorts. We found that 11 of 13 loci passed this  
195 much less stringent test of replication. The two loci that did not pass the sign test were the two  
196 locomotor loci “discovered” in  $F_{39-43}$  (Table 1).

**Table 1. Replication of significant SNPs between F<sub>34</sub> and F<sub>39-43</sub> AIL association analyses. “Discovery set” indicates the AIL generation that significant SNPs were identified. “Replication set” shows the association p-value,  $\beta$  estimates, etc. of the “discovery set” significant SNPs in the replication AIL generation. SNPs that replicated ( $p < 0.05$ , same sign for the beta) between F<sub>34</sub> and F<sub>39-43</sub> are highlighted in bold italics. Genetic correlations for phenotypes measured in both F<sub>34</sub> and F<sub>39-43</sub> are listed (see also Supplementary Table 6).**

| Phenotype                                               | rG(s.e.)(*p<0.05) | SNP                   | Discovery set           |       |           |          | Replication set          |       |           |          |
|---------------------------------------------------------|-------------------|-----------------------|-------------------------|-------|-----------|----------|--------------------------|-------|-----------|----------|
|                                                         |                   |                       | P<br>F34 GBS            | af    | beta      | se       | P<br>F3943 GBS replicate | af    | beta      | se       |
| Body weight                                             | 0.711(0.25)*      | <i>chr4.66414508</i>  | <b><i>8.06E-08</i></b>  | 0.419 | -2.50E-01 | 4.56E-02 | <b><i>1.56E-02</i></b>   | 0.406 | -1.05E-01 | 4.33E-02 |
|                                                         |                   | <i>chr6.81405109</i>  | <b><i>5.89E-06</i></b>  | 0.497 | 2.06E-01  | 4.51E-02 | <b><i>2.36E-02</i></b>   | 0.518 | 9.48E-02  | 4.18E-02 |
|                                                         |                   | <i>chr14.79312393</i> | <b><i>7.53E-06</i></b>  | 0.514 | -2.01E-01 | 4.45E-02 | <b><i>1.44E-02</i></b>   | 0.566 | -1.04E-01 | 4.26E-02 |
| Coat color, albino                                      | 0.967(0.04)*      | <i>chr7.87642045</i>  | <b><i>5.00E-106</i></b> | 0.432 | -5.81E-01 | 1.91E-02 | <b><i>2.85E-163</i></b>  | 0.387 | -6.07E-01 | 1.55E-02 |
| Coat color, agouti                                      | 0.971(0.04)*      | <i>chr2.154464466</i> | <b><i>9.43E-191</i></b> | 0.129 | 9.39E-01  | 1.25E-02 | <b><i>5.70E-93</i></b>   | 0.207 | 7.20E-01  | 2.57E-02 |
| Locomotor test day 1, total distance travelled in 30min | 0.968(0.24)*      | chr19.21812298        | 9.28E-07                | 0.461 | -6.90E+02 | 1.39E+02 | 7.72E-01                 | 0.52  | -1.94E-02 | 6.74E-02 |
| Locomotor test day2, total distance travelled in 30min  | 0.988(0.19)*      | chr7.45084416         | 1.12E-05                | 0.246 | 6.77E+02  | 1.53E+02 | 3.40E-01                 | 0.217 | 7.38E-02  | 7.77E-02 |
|                                                         |                   | chr8.17410225         | 4.96E-06                | 0.171 | 7.91E+02  | 1.71E+02 | 4.03E-01                 | 0.192 | 7.04E-02  | 8.43E-02 |
|                                                         |                   |                       | <b>F3943 GBS</b>        |       |           |          | <b>F34 GBS replicate</b> |       |           |          |
| Body weight                                             | 0.711(0.25)*      | <i>chr14.82586326</i> | <b><i>2.63E-06</i></b>  | 0.658 | -2.09E-01 | 4.43E-02 | <b><i>2.87E-05</i></b>   | 0.575 | -1.89E-01 | 4.50E-02 |
| Coat color, albino                                      | 0.967(0.04)*      | <i>chr7.87255156</i>  | <b><i>5.91E-167</i></b> | 0.389 | -6.24E-01 | 1.57E-02 | <b><i>7.80E-97</i></b>   | 0.444 | -5.75E-01 | 2.07E-02 |
| Coat color, agouti                                      | 0.971(0.04)*      | <i>chr2.155091628</i> | <b><i>1.78E-115</i></b> | 0.218 | 7.42E-01  | 2.17E-02 | <b><i>1.51E-185</i></b>  | 0.135 | 8.98E-01  | 1.33E-02 |
| Locomotor test day 2, total distance travelled in 30min | 0.988(0.19)*      | chr15.67235072        | 3.21E-06                | 0.47  | 3.14E-01  | 6.63E-02 | 1.69E-01                 | 0.522 | -1.72E+02 | 1.25E+02 |
| Locomotor test day 3, total distance travelled in 30min | 0.577(0.22)*      | chr7.113250866        | 5.88E-06                | 0.389 | 3.29E-01  | 7.20E-02 | 8.27E-01                 | 0.483 | -1.21E+02 | 5.45E+02 |

199 **Mega-analysis**

200           Due to the high genetic correlations between cohorts (S6 Table), we suspected that a  
201 mega-analysis using the combined sample set would allow for the identification of additional  
202 loci. This analysis identified four novel genome-wide significant associations that were not  
203 discovered in either individual cohort (Fig 3; Table 2; S9 Table).

204

205

**Table 2. Lead SNPs in F<sub>34</sub> and F<sub>39-43</sub> (N=1028) mega-analysis in locomotor activity (day 1 – 3) and body weight. Significant SNPs are clumped using parameters  $r_2=0.1$ , 12150kb. Rows in bold indicate SNPs that were discovered in the mega-analysis but not in individual F<sub>34</sub> or F<sub>39-43</sub> AILs.**

| Phenotype                                               | SNP                   | P               | af           | Beta             | se              | Discovery set                                                                    |
|---------------------------------------------------------|-----------------------|-----------------|--------------|------------------|-----------------|----------------------------------------------------------------------------------|
| Locomotor test day 1, total distance travelled in 30min | <b>chr1.122479820</b> | <b>8.84E-06</b> | <b>0.292</b> | <b>-2.03E-01</b> | <b>4.56E-02</b> | <b>Combined set</b>                                                              |
| Locomotor test day 1, total distance travelled in 30min | chr10.104988207       | 1.94E-07        | 0.373        | 2.16E-01         | 4.13E-02        | Combined set                                                                     |
| Locomotor test day 2, total distance travelled in 30min | chr1.40907532         | 2.65E-07        | 0.664        | 2.27E-01         | 4.38E-02        | Combined set                                                                     |
| Locomotor test day 2, total distance travelled in 30min | <b>chr1.123997667</b> | <b>3.53E-08</b> | <b>0.289</b> | <b>-2.53E-01</b> | <b>4.56E-02</b> | <b>Combined set</b>                                                              |
| <b>Body weight</b>                                      | <b>chr2.157502044</b> | <b>1.10E-05</b> | <b>0.42</b>  | <b>-1.35E-01</b> | <b>3.06E-02</b> | <b>Combined set</b>                                                              |
| Body weight                                             | chr4.66866758         | 1.64E-09        | 0.403        | -1.84E-01        | 3.01E-02        | F <sub>34</sub> array, F <sub>34</sub> GBS, combined set                         |
| Body weight                                             | chr6.81267890         | 8.61E-07        | 0.507        | 1.40E-01         | 2.83E-02        | F <sub>34</sub> GBS, combined set                                                |
| Body weight                                             | chr14.82672838        | 2.06E-10        | 0.623        | -1.90E-01        | 2.96E-02        | F <sub>34</sub> array, F <sub>34</sub> GBS, F <sub>39-43</sub> GBS, combined set |

206

207

208

209

210

211

212

## 213 Discussion

214 Outbred model organism populations have become important resources for genetics  
215 studies. We used  $F_{34}$  and  $F_{39-43}$  generations of a LG/J x SM/J AIL to investigate how SNP  
216 density influences GWAS results, heritability, and genetic correlations. Using the ~60K SNPs in  
217 the  $F_{34}$  GBS set, we found 110 loci, of which 36 were unique to the GBS genotypes. Notably,  
218  $F_{34}$  array genotypes were able to detect the majority of loci that were identified in  $F_{34}$  GBS SNP  
219 set, indicating that many but not all loci were successfully 'tagged' by the sparse array SNPs.  
220 Although the genetic correlations between traits measured in  $F_{34}$  and  $F_{39-43}$  were high,  
221 replication was incomplete, with the locomotor traits showing especially poor replication. Finally,  
222 imputation to reference panels increased the number of SNPs available for analysis but did not  
223 meaningfully enhance the number of loci we discovered because it did not improve our ability to  
224 capture recombination events.

225 Previous work from our lab used the array genotypes described in this study to map  
226 QTLs for various behavioral and physiological traits in 688  $F_{34}$  AILs. With  $F_{34}$  GBS SNPs, which  
227 were only available for 428 of the initial 688 AIL mice, we were able to replicate many of our  
228 previously published loci. For instance, using the array SNPs in the  $F_{34}$  generation in  
229 conjunction with the LMM software QTLRel, Cheng et al. [35] found a significant locus on  
230 chromosome 8 for locomotor day 2 activity that contained only one gene: *Csmd1* (CUB and  
231 sushi multiple domains 1). Gonzales et al. [39] replicated this finding in  $F_{50-56}$  AIL and identified a  
232 *cis*-eQTL mapped to the same region. *Csmd1* mutant mice showed increased locomotor activity  
233 compared to wild-type and heterozygous mice, indicating that *Csmd1* is likely a causal gene for  
234 locomotor and related traits [39]. We replicated this locus in our own analysis of the  $F_{34}$  array  
235 and GBS SNP, using GEMMA rather than QTLRel (S7 Fig). We also replicated a locus on  
236 chromosome 17 for distance traveled in the periphery in the open field test (Fig 4; [36,39]), three  
237 loci on chromosomes 4, 6, and 14 for body weight (Supplementary Fig 7; [54]), one locus on

238 chromosome 7 for mean corpuscular hemoglobin concentrations (MCHC, complete blood count;  
239 S7 Fig; [55]), and numerous loci on chromosome 4, 6, 7, 8, and 11 for muscle weights  
240 (Supplementary Fig 7; [37]). We noticed that while using the same set of  $F_{34}$  array genotypes,  
241 some previously published loci were not detected in our GWAS. The most likely explanation is  
242 that we had only 428 of the 688 mice used in the previous publications in this study.  
243 Methodological differences between prior studies and the current study, such as the use of  
244 QTLRel rather than GEMMA and the choice of pedigree rather than genotypes in relatedness  
245 calculation, may also lead to lack of complete replication [56].

246  $F_{39-43}$  AILs replicated some, but not all, significant loci identified in  $F_{34}$ , despite generally  
247 high genetic correlations between the two cohorts. Significant loci for coat color, which are  
248 monogenic and viewed as positive controls, were consistent between the two AIL cohorts. Loci  
249 for body weight were fully replicated between  $F_{34}$  and  $F_{39-43}$  using the  $p < 0.05$  cutoff for the  
250 replication cohort, whereas loci for locomotor activity were not. Nevertheless, the beta estimates  
251 for all but two loci shared the same sign, which provides modest evidence for replication. The  
252 circumstances under which the  $F_{39-43}$  data were collected were not ideal, likely contributing to  
253 their lower heritability and the limited replication. Unlike the  $F_{34}$  dataset, the  $F_{39-43}$  used multiple  
254 technicians to conduct the behavioral tests and occurred over a prolonged period of time in  
255 which numerous environmental factors may have changed.

256 We performed a mega-analysis using  $F_{34}$  and  $F_{39-43}$  AIL mice. The combined dataset  
257 increased our power and allowed us to identify four novel genome-wide significant associations  
258 that were not detected in either the  $F_{34}$  or the  $F_{39-43}$  cohorts. For example, the mega-analysis  
259 identified a locus for body weight on chromosome 2 (Fig S7). Parker et al. [54] identified the  
260 same locus using an integrated analysis of LG/J x SM/J  $F_2$  and  $F_{34}$  AILs.

261 Many GWAS use a 1.0~2.0 LOD support interval to approximate the size of the  
262 association region (see [57,58]). The LOD support interval, proposed by Conneally et al. [59]  
263 and Lander & Botstein [60], is a simple confidence interval method involving converting the p-  
264 value of the peak locus into a LOD score, subtracting “drop size” from the peak locus LOD  
265 score, and finding the two physical positions to the left and to the right of the peak locus location  
266 that correspond to the subtracted LOD score. Although Mangin et al. [61] showed via simulation  
267 that the boundaries of LOD support intervals depend on effect size, others observed that a 1.0 ~  
268 2.0 LOD support interval accurately captures ~95% coverage of the true location of the loci  
269 when using a dense set of markers [60,62,63]. In the present study, we considered using LOD  
270 support intervals but found that the sparse array SNPs produced misleadingly large support  
271 intervals. Various methods have been proposed for calculating confidence intervals in  
272 analogous situations (e.g. [12,64]). Rather than adopting a formal method, we compared  
273 LocusZoom plots of the same locus region between array SNPs and the GBS SNPs (S7 Fig;  
274 [65]). For example, the benefit of the denser SNP coverage is easily observed in the locus on  
275 chromosome 7 for “complete blood count, repeat measure of retic parameters, cell hemoglobin  
276 concentration mean” (Fig S7). Thus, there are advantages of dense SNP sets that go beyond  
277 the ability to discover additional loci (Table 1).

278 Our study has notable limitations. First, not all F<sub>34</sub> and F<sub>39-43</sub> animals that were  
279 phenotyped were later genotyped by GBS due to missing tissue samples, which in turn lowered  
280 our sample size and reduced the power of association analyses. Second, F<sub>39-43</sub> traits have been  
281 collected by different technicians over the span of several years, which introduced noise and  
282 diminished trait heritability (Fig 2).

283 The present study explored the role of marker density and imputation in GWAS.  
284 Furthermore, the combination of denser marker coverage and the addition of 600 F<sub>39-43</sub> AIL mice  
285 allowed us to identify novel loci for locomotor activity, open field test, fear conditioning, light dark

286 test for anxiety, complete blood count, iron content in liver and spleen, and muscle weight. Our  
287 findings add to the large body of phenotypic/genotypic data available for the LG/SM AIL, which  
288 can be found on GeneNetwork [<http://www.genenetwork.org>].

289

## 290 **Materials and Methods**

### 291 **Animals**

292 All mice used in this study were members of the advanced intercross line (**AIL**) between  
293 LG/J and SM/J that was originally created by Dr. James Cheverud (Washington University, St.  
294 Louis, MO). The AIL line has been maintained in the Palmer laboratory since generation F<sub>33</sub>.  
295 Age and exact number of animals tested in each phenotype are described in S1 Table. Several  
296 previous publications [16,35–38,54,55] have reported on association analyses of the F<sub>34</sub> mice  
297 (N=428). No prior publications have described the F<sub>39-43</sub> generations (N=600). The sample size  
298 of F<sub>34</sub> mice reported in this study (N=428) is smaller than that in previous publications of F<sub>34</sub>  
299 (N=688) because we only sequenced a subset of F<sub>34</sub> animals using GBS. With the exception of  
300 coat color and locomotor activities, we quantile normalized all phenotypes. Coat color traits  
301 were coded in binary numbers (albino: 1 = white, 0 = non-white; agouti: 1 = tan, 0 = black,  
302 NA=white). Locomotor activity traits were not quantile transformed in order to follow the  
303 guideline described in Cheng et al. [35] for direct comparison.

304

### 305 **F<sub>34</sub>, F<sub>39-43</sub> Phenotypes**

306 We have previously described the phenotyping of F<sub>34</sub> animals for locomotor activity [35],  
307 fear conditioning [36], open field [36], coat color, body weight [54], complete blood counts [55],  
308 heart and tibia measurements [37], muscle weight [37]. Iron content in liver and spleen, which



309 have not been previously reported in these mice, was measured by atomic absorption  
310 spectrophotometry, as described in Gardenghi et al. [66] and Graziano, Grady and Cerami [67].  
311 Although the phenotyping of F<sub>39-43</sub> animals has not been previously reported, we used method  
312 that were identical to those previously reported for locomotor activity [35], open field [36], coat  
313 color, body weight [54], and light/dark test for anxiety [15].

314

### 315 **F<sub>34</sub> AIL Array Genotypes**

316 F<sub>34</sub> animals had been genotyped on a custom SNP array on the Illumina Infinium  
317 platform [35,36], which yielded a set of 4,593 SNPs on autosomes and X chromosome that we  
318 refer to as 'array SNPs'.

319

### 320 **F<sub>34</sub> and F<sub>39-43</sub> GBS Genotypes**

321 F<sub>34</sub> and F<sub>39-43</sub> animals were genotyped using genotyping-by-sequencing (**GBS**), which is  
322 a reduced-representation genome sequencing method [1,39]. We used the same protocol for  
323 GBS library preparation that was described in Gonzales et al [39]. We called GBS genotype  
324 probabilities using ANGSD [68]. GBS identified 1,667,920 autosomal and 43,015 X-  
325 chromosome SNPs. To fill in missing genotypes at SNPs where some but not all mice had calls,  
326 we ran within-sample imputation using Beagle v4.1, which generated hard call genotypes as  
327 well as genotype probabilities [52]. After imputation, only SNPs that had dosage  $r^2 > 0.9$  were  
328 retained. We removed SNPs with minor allele frequency  $< 0.1$  and SNPs with  $p < 1.0 \times 10^{-6}$  in the  
329 Chi-square test of Hardy–Weinberg Equilibrium (**HWE**) (S2 Table). All phenotype and GBS  
330 genotype data are deposited in GeneNetwork (<http://www.genenetwork.org>).

331

## 332 **QC of individuals**

333           We have found that large genetic studies are often hampered by cross-contamination  
334 between samples and sample mix-ups. We used four features of the data to identify problematic  
335 samples: heterozygosity distribution, proportion of reads aligned to sex chromosomes,  
336 pedigree/kinship, and coat color. We first examined heterozygosity across autosomes and  
337 removed animals where the proportion of heterozygosity that was more than 3 standard  
338 deviations from the mean (S1 Fig). Next, we sought to identify animals in which the recorded  
339 sex did not agree with the sequencing data. We compared the ratio of reads mapped to the X  
340 and Y chromosomes. The 95% CI for this ratio was 196.84 to 214.3 in females and 2.13 to 2.18  
341 in males. Twenty-two  $F_{34}$  and  $F_{39-43}$  animals were removed because their sex (as determined by  
342 reads ratio) did not agree with their recorded sex; we assumed this discrepancy was due to  
343 sample mix-ups. To further identify mislabeled samples, we calculated kinship coefficients  
344 based on the full AIL pedigree using QTLRel. We then calculated a genetic relatedness matrix  
345 (**GRM**) using IBDLD, which estimates identity by descent using genotype data. The comparison  
346 between pedigree kinship relatedness and genetic kinship relatedness identified 7 pairs of  
347 animals that showed obvious disagreement between kinship coefficients and the GRM. Lastly,  
348 we excluded 14  $F_{39-43}$  animals that showed discordance between their recorded coat color and  
349 their genotypes at markers flanking *Tyr*, which causes albinism in mice. The numbers of animals  
350 filtered at each step are listed in S2 Table. Some animals were detected by more than one QC  
351 step, substantiating our belief that these samples were erroneous.

352           At the end of SNP and sample filtering, we had 59,561 autosomal and 831 X  
353 chromosome SNPs in  $F_{34}$ , 58,966 autosomal and 824 X chromosome SNPs in  $F_{39-43}$ , and  
354 57,635 autosomal and 826 X chromosome SNPs in the combined  $F_{34}$  and  $F_{39-43}$  set (S2 Table).  
355 GBS genotype quality was estimated by examining concordance between the 66 SNPs that  
356 were present in both the array and GBS genotyping results.

## 357 **LD decay**

358 Average LD ( $r^2$ ) was calculated using allele frequency matched SNPs (MAF difference <  
359 0.05) within 100,000bp distance, as described in Parker et al. [1].

360

## 361 **Imputation to LG/J and SM/J reference panels**

362  $F_{34}$  array genotypes (N=428) and  $F_{34}$  GBS genotypes (N=428) were imputed to LG/J and  
363 SM/J whole genome sequence data [51] using BEAGLE. For  $F_{34}$  array imputation, we used a  
364 large window size (100,000 SNPs and 45,000 SNPs overlap). Imputation to reference panels  
365 yielded 4.3 million SNPs for  $F_{34}$  array and  $F_{34}$  GBS imputed sets. Imputed SNPs with  $DR^2 > 0.9$ ,  
366  $MAF > 0.1$ , HWE p value  $> 1.0 \times 10^{-6}$  were retained, resulting in 4.1M imputed  $F_{34}$  GBS SNPs  
367 and 4.3M imputed  $F_{34}$  array SNPs.

368

## 369 **Genome-wide association analysis (GWAS)**

370 We used the linear mixed model, as implemented in GEMMA [44], to perform a GWAS  
371 that accounted for the complex familial relationships among the AIL mice [35,39]. We used the  
372 leave-one-chromosome-out (**LOCO**) approach to calculate genetic relatedness matrix, which  
373 effectively circumvented the problem of proximal contamination [46]. Separate GWAS were  
374 performed using  $F_{34}$  array genotypes,  $F_{34}$  GBS genotypes, and  $F_{39-43}$  GBS genotypes. Apart  
375 from coat color (binary trait) and locomotor activity, raw phenotypes were quantile normalized  
376 prior to analysis. Locomotor activity was not quantile normalized because the trait was  
377 reasonably normally distributed already and because we wanted our analysis to match those  
378 performed in Cheng et al [35]. Because  $F_{34}$  AIL had already been studied using array genotypes  
379 [35] and mapped using QTLRel [56], we used the same covariates as described in Cheng et al.

380 [35] in order to examine whether our array and GBS GWAS would replicate their findings. We  
381 included sex and body weight as covariates for locomotor activity traits (see covariates used in  
382 [35]) and sex, age, and coat color as covariates for fear conditioning and open field test in  $F_{34}$   
383 AILs (see covariates used in [36]). We used sex and age as covariates for all other phenotypes.  
384 Covariates for each analysis are shown in S1 Table. Finally, we performed mega-analysis of  $F_{34}$   
385 and  $F_{39-43}$  animals (N=1,028) for body weight, coat color, and locomotor activity, since these  
386 traits were measured in the same way in both cohorts. For the mega-analyses, locomotor  
387 activity was quantile normalized after the combination of the two datasets to ensure that data  
388 were normally distributed across generations.

389

### 390 **Identifying suspicious SNPs**

391 Some significant SNPs in  $F_{34}$  GWAS and in the mega-analysis of  $F_{34}$  and  $F_{39-43}$  were  
392 suspicious because nearby SNPs, which would have been expected to be in high LD (a very  
393 strong assumption in an AIL), did not have high  $-\log_{10}$  values. We only examined SNPs that  
394 obtained significant p-values; these examinations revealed that these SNPs had suspicious ratios  
395 of heterozygotes to homozygotes calls and had corresponding HWE p-values that were close to  
396 our  $1.0 \times 10^{-6}$  threshold (S10 and S11 Tables). To avoid counting these as novel loci, we  
397 removed those SNPs prior to summarizing our results as they likely reflected genotyping errors.

398

### 399 **Selecting independent significant SNPs**

400 To identify independent “lead loci” among significant GWAS SNPs that surpass the  
401 significance threshold, we used the LD-based clumping method in PLINK v1.9. We empirically  
402 chose clumping parameters ( $r^2 = 0.1$  and sliding window size = 12,150kb) that gave us a

403 conservative set of independent SNPs (S3 Table). For the coat color phenotypes, we found that  
404 multiple SNPs remained significant even after LD-based clumping, presumably due to the  
405 extremely significant associations at these Mendelian loci. In these cases, we used a stepwise  
406 model selection procedure in GCTA [69] and performed association analyses conditioning on  
407 the most significant SNPs.

408

### 409 **Significance thresholds**

410 We used MultiTrans and SLIDE to set significance thresholds for the GWAS [48,49].  
411 MultiTrans and SLIDE are methods that assume multivariate normal distribution of the  
412 phenotypes, which in LMM models, contain a covariance structure due to various degrees of  
413 relatedness among individuals. We were curious to see whether MultiTrans/SLIDE produces  
414 significance thresholds drastically different from the threshold we obtained from a standard  
415 permutation test ('naïve permutation' as per Cheng et al. [46]). We performed 1,000  
416 permutations using the F<sub>34</sub> GBS genotypes and the phenotypic data from locomotor activity  
417 (days 1, 2, and 3). We found that the 95<sup>th</sup> percentile values for these permutations were 4.65,  
418 4.79, and 4.85, respectively, which were very similar to 4.85, the threshold obtained from  
419 MultiTrans using the same data. Thus, the thresholds presented here were obtained from  
420 MultiTrans but are similar (if anything slightly more conservative) than thresholds we would have  
421 obtained had we used permutation. Because the effective number of tests depends on the  
422 number of SNPs and the specific animals used in GWAS, we obtained a unique adjusted  
423 significance threshold for each SNP set in each animal cohort (S12 Table).

424

425

## 426 **Genetic correlation and heritability estimates between $F_{34}$ and $F_{39-43}$ phenotypes**

427           Locomotor activity, body weight, and coat color had been measured in both  $F_{34}$  and  $F_{39-}$   
428  $_{43}$  populations. We calculated both SNP heritability and genetic correlations between  $F_{34}$  and  
429  $F_{39-43}$  animals using GCTA bivariate GREML analysis [69]. Because  $F_{39-43}$  day 1 locomotor  
430 activity data were not normally distributed, we quantile normalized locomotor activity data when  
431 estimating SNP heritabilities and genetic correlations.

432

## 433 **LocusZoom Plots**

434 LocusZoom plots were generated using the standalone implementation of LocusZoom [65],  
435 using LD scores calculated from PLINK v.1.9 --ld option and mm10 gene annotation file  
436 downloaded from UCSC genome browser.

437

## 438 **Ethics Statement**

439 All procedures were approved by the Institutional Animal Care and Use Committee (IACUC  
440 protocol: S15226) Euthanasia was accomplished using CO<sub>2</sub> asphyxiation followed by cervical  
441 dislocation

442 .

## 443 **Acknowledgements**

444 We would like to recognize Jackie Lim and Kaitlin Samocha for collecting  $F_{34}$  AIL phenotype  
445 data and Ryan Walters for collecting  $F_{39-43}$  AIL phenotype data. We wish to acknowledge Alex  
446 Gileta for input on a draft of this manuscript.

447

448

449

450

451

## 452 **References**

- 453 1. Parker CC, Gopalakrishnan S, Carbonetto P, Gonzales NM, Leung E, Park YJ, et al. Genome-wide  
454 association study of behavioral, physiological and gene expression traits in outbred CFW mice. *Nat*  
455 *Genet.* 2016;48(8):919.
- 456 2. Gatti DM, Svenson KL, Shabalin A, Wu L-Y, Valdar W, Simecek P, et al. Quantitative trait locus  
457 mapping methods for diversity outbred mice. *G3 Genes Genomes Genet.* 2014;4(9):1623–1633.
- 458 3. Chesler EJ. Out of the bottleneck: the Diversity Outcross and Collaborative Cross mouse  
459 populations in behavioral genetics research. *Mamm Genome.* 2014;25(1–2):3–11.
- 460 4. Churchill GA, Gatti DM, Munger SC, Svenson KL. The diversity outbred mouse population. *Mamm*  
461 *Genome.* 2012;23(9–10):713–718.
- 462 5. Consortium CC. The genome architecture of the Collaborative Cross mouse genetic reference  
463 population. *Genetics.* 2012;190(2):389–401.
- 464 6. Talbot CJ, Nicod A, Cherny SS, Fulker DW, Collins AC, Flint J. High-resolution mapping of  
465 quantitative trait loci in outbred mice. *Nat Genet.* 1999;21(3):305.
- 466 7. Demarest K, Koyner J, McCaughran J, Cipp L, Hitzemann R. Further characterization and high-  
467 resolution mapping of quantitative trait loci for ethanol-induced locomotor activity. *Behav Genet.*  
468 2001;31(1):79–91.
- 469 8. Valdar W, Solberg LC, Gauguier D, Burnett S, Klenerman P, Cookson WO, et al. Genome-wide  
470 genetic association of complex traits in heterogeneous stock mice. *Nat Genet.* 2006;38(8):879.
- 471 9. Ghazalpour A, Doss S, Kang H, Farber C, Wen P-Z, Brozell A, et al. High-resolution mapping of gene  
472 expression using association in an outbred mouse stock. *PLoS Genet.* 2008;4(8):e1000149.
- 473 10. Svenson KL, Gatti DM, Valdar W, Welsh CE, Cheng R, Chesler EJ, et al. High-resolution genetic  
474 mapping using the Mouse Diversity outbred population. *Genetics.* 2012;190(2):437–447.

- 475 11. Yalcin B, Willis-Owen SA, Fullerton J, Meesaq A, Deacon RM, Rawlins JNP, et al. Genetic dissection  
476 of a behavioral quantitative trait locus shows that *Rgs2* modulates anxiety in mice. *Nat Genet.*  
477 2004;36(11):1197.
- 478 12. Nicod J, Davies RW, Cai N, Hassett C, Goodstadt L, Cosgrove C, et al. Genome-wide association of  
479 multiple complex traits in outbred mice by ultra-low-coverage sequencing. *Nat Genet.*  
480 2016;48(8):912.
- 481 13. Carbonetto P, Cheng R, Gyekis JP, Parker CC, Blizard DA, Palmer AA, et al. Discovery and  
482 refinement of muscle weight QTLs in B6 $\times$ D2 advanced intercross mice. *Physiol Genomics.*  
483 2014;46(16):571–582.
- 484 14. Coyner J, McGuire JL, Parker CC, Ursano RJ, Palmer AA, Johnson LR. Mice selectively bred for High  
485 and Low fear behavior show differences in the number of pMAPK (p44/42 ERK) expressing neurons  
486 in lateral amygdala following Pavlovian fear conditioning. *Neurobiol Learn Mem.* 2014;112:195–  
487 203.
- 488 15. Parker CC, Cheng R, Sokoloff G, Palmer AA. Genome-wide association for methamphetamine  
489 sensitivity in an advanced intercross mouse line. *Genes Brain Behav.* 2012;11(1):52–61.
- 490 16. Samocha KE, Lim JE, Cheng R, Sokoloff G, Palmer AA. Fine mapping of QTL for prepulse inhibition in  
491 LG/J and SM/J mice using F2 and advanced intercross lines. *Genes Brain Behav.* 2010;9(7):759–  
492 767.
- 493 17. Hernandez Cordero AI, Carbonetto P, Riboni Verri G, Gregory JS, Vandenberg DJ, P Gyekis J, et al.  
494 Replication and discovery of musculoskeletal QTLs in LG/J and SM/J advanced intercross lines.  
495 *Physiol Rep.* 2018;6(4).
- 496 18. Baud A, Guryev V, Hummel O, Johannesson M, Hermsen R, Stridh P, et al. Genomes and phenomes  
497 of a population of outbred rats and its progenitors. *Sci Data.* 2014;1:140011.
- 498 19. Besnier F, Wahlberg P, Rönnegard L, Ek W, Andersson L, Siegel PB, et al. Fine mapping and  
499 replication of QTL in outbred chicken advanced intercross lines. *Genet Sel Evol.* 2011;43(1):3.
- 500 20. Johnsson M, Henriksen R, Höglund A, Fogelholm J, Jensen P, Wright D. Genetical genomics of  
501 growth in a chicken model. *BMC Genomics.* 2018;19(1):72.
- 502 21. Guryev V, Koudijs MJ, Berezikov E, Johnson SL, Plasterk RH, Van Eeden FJ, et al. Genetic variation in  
503 the zebrafish. *Genome Res.* 2006;16(4):491–497.
- 504 22. Patowary A, Purkanti R, Singh M, Chauhan R, Singh AR, Swarnkar M, et al. A sequence-based  
505 variation map of zebrafish. *Zebrafish.* 2013;10(1):15–20.
- 506 23. Mackay TF, Richards S, Stone EA, Barbadilla A, Ayroles JF, Zhu D, et al. The *Drosophila*  
507 *melanogaster* genetic reference panel. *Nature.* 2012;482(7384):173.
- 508 24. Vonesch SC, Lamparter D, Mackay TF, Bergmann S, Hafen E. Genome-wide analysis reveals novel  
509 regulators of growth in *Drosophila melanogaster*. *PLoS Genet.* 2016;12(1):e1005616.



- 510 25. King EG, Macdonald SJ, Long AD. Properties and power of the Drosophila Synthetic Population  
511 Resource for the routine dissection of complex traits. *Genetics*. 2012;genetics–112.
- 512 26. Kislukhin G, King EG, Walters KN, Macdonald SJ, Long AD. The genetic architecture of  
513 methotrexate toxicity is similar in *Drosophila melanogaster* and humans. *G3 Genes Genomes*  
514 *Genet*. 2013;g3–113.
- 515 27. Marriage TN, King EG, Long AD, Macdonald SJ. Fine-mapping nicotine resistance loci in *Drosophila*  
516 using a multiparent advanced generation inter-cross population. *Genetics*. 2014;198(1):45–57.
- 517 28. Doitsidou M, Jarriault S, Poole RJ. Next-generation sequencing-based approaches for mutation  
518 mapping and identification in *Caenorhabditis elegans*. *Genetics*. 2016;204(2):451–474.
- 519 29. Diouf IA, Derivot L, Bitton F, Pascual L, Causse M. Water Deficit and Salinity Stress Reveal Many  
520 Specific QTL for Plant Growth and Fruit Quality Traits in Tomato. *Front Plant Sci*. 2018;9:279.
- 521 30. Cockram J, Mackay I. Genetic Mapping Populations for Conducting High-Resolution Trait Mapping  
522 in Plants. 2018;
- 523 31. Rishmawi L, Bühler J, Jaegle B, Hülskamp M, Koornneef M. Quantitative trait loci controlling leaf  
524 venation in *Arabidopsis*. *Plant Cell Environ*. 2017;40(8):1429–1441.
- 525 32. Parker CC, Palmer AA. Dark matter: are mice the solution to missing heritability? *Front Genet*.  
526 2011;2:32.
- 527 33. Darvasi A, Soller M. Advanced intercross lines, an experimental population for fine genetic  
528 mapping. *Genetics*. 1995;141(3):1199–1207.
- 529 34. Gonzales NM, Palmer AA. Fine-mapping QTLs in advanced intercross lines and other outbred  
530 populations. *Mamm Genome*. 2014;25(7–8):271–292.
- 531 35. Cheng R, Lim JE, Samocha KE, Sokoloff G, Abney M, Skol AD, et al. Genome-wide association  
532 studies and the problem of relatedness among advanced intercross lines and other highly  
533 recombinant populations. *Genetics*. 2010;
- 534 36. Parker CC, Carbonetto P, Sokoloff G, Park YJ, Abney M, Palmer AA. High-resolution genetic  
535 mapping of complex traits from a combined analysis of F2 and advanced intercross mice. *Genetics*.  
536 2014;198(1):103–116.
- 537 37. Lionikas A, Cheng R, Lim JE, Palmer AA, Blizard DA. Fine-mapping of muscle weight QTL in LG/J and  
538 SM/J intercrosses. *Physiol Genomics*. 2010;42(1):33–38.
- 539 38. Carroll AM, Cheng R, Collie-Duguid ESR, Meharg C, Scholz ME, Fiering S, et al. Fine-mapping of  
540 genes determining extrafusil fiber properties in murine soleus muscle. *Physiol Genomics*.  
541 2017;49(3):141–150.
- 542 39. Gonzales NM, Seo J, Hernandez-Cordero AI, Pierre CLS, Gregory JS, Distler MG, et al. Genome wide  
543 association study of behavioral, physiological and gene expression traits in a multigenerational  
544 mouse intercross. *bioRxiv*. 2017 Dec 8;230920.

- 545 40. Elshire RJ, Glaubitz JC, Sun Q, Poland JA, Kawamoto K, Buckler ES, et al. A robust, simple  
546 genotyping-by-sequencing (GBS) approach for high diversity species. *PLoS One*. 2011;6(5):e19379.
- 547 41. Davey JW, Hohenlohe PA, Etter PD, Boone JQ, Catchen JM, Blaxter ML. Genome-wide genetic  
548 marker discovery and genotyping using next-generation sequencing. *Nat Rev Genet*.  
549 2011;12(7):499.
- 550 42. Fitzpatrick CJ, Gopalakrishnan S, Cogan ES, Yager LM, Meyer PJ, Lovic V, et al. Variation in the form  
551 of Pavlovian conditioned approach behavior among outbred male Sprague-Dawley rats from  
552 different vendors and colonies: sign-tracking vs. goal-tracking. *PLoS One*. 2013;8(10):e75042.
- 553 43. Toker L, Feng M, Pavlidis P. Whose sample is it anyway? Widespread misannotation of samples in  
554 transcriptomics studies. *F1000Research* (Internet). 2016 Sep 30 (cited 2018 Jul 11);5. Available  
555 from: <https://www.ncbi.nlm.nih.gov/pmc/articles/PMC5034794/>
- 556 44. Zhou X, Stephens M. Genome-wide efficient mixed-model analysis for association studies. *Nat*  
557 *Genet*. 2012;44(7):821.
- 558 45. Listgarten J, Lippert C, Kadie CM, Davidson RI, Eskin E, Heckerman D. Improved linear mixed  
559 models for genome-wide association studies. *Nat Methods*. 2012;9(6):525.
- 560 46. Cheng R, Parker CC, Abney M, Palmer AA. Practical considerations regarding the use of genotype  
561 and pedigree data to model relatedness in the context of genome-wide association studies. *G3*  
562 *Genes Genomes Genet*. 2013;g3–113.
- 563 47. Yang J, Zaitlen NA, Goddard ME, Visscher PM, Price AL. Advantages and pitfalls in the application of  
564 mixed-model association methods. *Nat Genet*. 2014;46(2):100.
- 565 48. Joo JWJ, Hormozdiari F, Han B, Eskin E. Multiple testing correction in linear mixed models. *Genome*  
566 *Biol*. 2016;17(1):62.
- 567 49. Han B, Kang HM, Eskin E. Rapid and accurate multiple testing correction and power estimation for  
568 millions of correlated markers. *PLoS Genet*. 2009;5(4):e1000456.
- 569 50. Purcell S, Neale B, Todd-Brown K, Thomas L, Ferreira MA, Bender D, et al. PLINK: a tool set for  
570 whole-genome association and population-based linkage analyses. *Am J Hum Genet*.  
571 2007;81(3):559–575.
- 572 51. Nikolskiy I, Conrad DF, Chun S, Fay JC, Cheverud JM, Lawson HA. Using whole-genome sequences  
573 of the LG/J and SM/J inbred mouse strains to prioritize quantitative trait genes and nucleotides.  
574 *BMC Genomics*. 2015;16(1):415.
- 575 52. Browning SR, Browning BL. Rapid and accurate haplotype phasing and missing-data inference for  
576 whole-genome association studies by use of localized haplotype clustering. *Am J Hum Genet*.  
577 2007;81(5):1084–1097.
- 578 53. Yang J, Zeng J, Goddard ME, Wray NR, Visscher PM. Concepts, estimation and interpretation of  
579 SNP-based heritability. *Nat Genet*. 2017 Sep;49(9):1304–10.

- 580 54. Parker CC, Cheng R, Sokoloff G, Lim JE, Skol AD, Abney M, et al. Fine-mapping alleles for body  
581 weight in LG/J × SM/J F<sub>2</sub> and F<sub>34</sub> advanced  
582 intercross lines. *Mamm Genome*. 2011 Oct 1;22(9–10):563.
- 583 55. Bartnikas TB, Parker CC, Cheng R, Campagna DR, Lim JE, Palmer AA, et al. QTLs for murine red  
584 blood cell parameters in LG/J and SM/J F<sub>2</sub> and advanced intercross lines. *Mamm Genome*. 2012  
585 Jun;23(5–6):356–66.
- 586 56. Cheng R, Abney M, Palmer AA, Skol AD. QTLRel: an R package for genome-wide association studies  
587 in which relatedness is a concern. *BMC Genet*. 2011 Jul 27;12:66.
- 588 57. Logan RW, Robledo RF, Recla JM, Philip VM, Bubier JA, Jay JJ, et al. High-precision genetic mapping  
589 of behavioral traits in the diversity outbred mouse population. *Genes Brain Behav*.  
590 2013;12(4):424–437.
- 591 58. Cervino AC, Li G, Edwards S, Zhu J, Laurie C, Tokiwa G, et al. Integrating QTL and high-density SNP  
592 analyses in mice to identify *Insig2* as a susceptibility gene for plasma cholesterol levels. *Genomics*.  
593 2005;86(5):505–517.
- 594 59. Conneally PM, Edwards JH, Kidd KK, Lalouel J-M, Morton NE, Ott J, et al. Report of the committee  
595 on methods of linkage analysis and reporting. *Cytogenet Genome Res*. 1985;40(1–4):356–9.
- 596 60. Lander ES, Botstein D. Mapping mendelian factors underlying quantitative traits using RFLP linkage  
597 maps. *Genetics*. 1989;121(1):185–199.
- 598 61. Mangin B, Goffinet B, Rebai A. Constructing confidence intervals for QTL location. *Genetics*.  
599 1994;138(4):1301–1308.
- 600 62. Dupuis J, Siegmund D. Statistical methods for mapping quantitative trait loci from a dense set of  
601 markers. *Genetics*. 1999;151(1):373–386.
- 602 63. Manichaikul A, Dupuis J, Sen S, Broman KW. Poor performance of bootstrap confidence intervals  
603 for the location of a quantitative trait locus. *Genetics*. 2006;
- 604 64. Sequencing RG, Baud A, Hermsen R, Guryev V, Stridh P, Graham D, et al. Combined sequence-  
605 based and genetic mapping analysis of complex traits in outbred rats. *Nat Genet*. 2013;45(7):767.
- 606 65. Pruim RJ, Welch RP, Sanna S, Teslovich TM, Chines PS, Gliedt TP, et al. LocusZoom: regional  
607 visualization of genome-wide association scan results. *Bioinformatics*. 2010;26(18):2336–2337.
- 608 66. Gardenghi S, Marongiu MF, Ramos P, Guy E, Breda L, Chadburn A, et al. Ineffective erythropoiesis  
609 in  $\beta$ -thalassemia is characterized by increased iron absorption mediated by down-regulation of  
610 hepcidin and up-regulation of ferroportin. *Blood*. 2007;109(11):5027–5035.
- 611 67. Graziano JH, Grady RW, Cerami A. The identification of 2, 3-dihydroxybenzoic acid as a potentially  
612 useful iron-chelating drug. *J Pharmacol Exp Ther*. 1974;190(3):570–575.
- 613 68. Korneliussen TS, Albrechtsen A, Nielsen R. ANGSD: analysis of next generation sequencing data.  
614 *BMC Bioinformatics*. 2014;15(1):356.

615 69. Yang J, Lee SH, Goddard ME, Visscher PM. GCTA: a tool for genome-wide complex trait analysis.  
616 Am J Hum Genet. 2011 Jan 7;88(1):76–82.

617

618

619

620

621

## 622 Main figure legends

623

624 **Fig 1. Minor allele frequency distributions for F<sub>34</sub> array, F<sub>34</sub> GBS, F<sub>39</sub>-F<sub>43</sub> GBS, and F<sub>34</sub> and**  
625 **F<sub>39</sub>-F<sub>43</sub> GBS SNP sets.** MAF distributions are highly comparable between AIL generations.

626 **Fig 2. Chip-heritability estimates in F<sub>34</sub> and F<sub>39-43</sub> AILs.** All heritability estimates are highly  
627 significant ( $p < 1.0E-05$ ; see S7 Table).

628 **Fig 3. Manhattan plots comparing F<sub>34</sub> GBS, F<sub>39-43</sub> GBS, and mega-analysis on locomotor**  
629 **day 1 test using 57,170 shared SNPs in all AIL generations.** Mega-analysis identified a locus  
630 on chromosome 10 (chr10.104988207) that was not detected in the F<sub>34</sub> or F<sub>39</sub>-F<sub>43</sub> alone,  
631 suggesting that mega-analysis enhanced power to detect some loci.

632 **Fig 4. Significant loci on chromosome 17 for open field, distance traveled in periphery in**  
633 **F<sub>34</sub> AIL. (a)** Genome-wide Manhattan plots highlighting the significant loci on chromosome 17  
634 associated with open field, distance traveled in periphery in F<sub>34</sub> array SNP set (chr17:27427358)  
635 and F<sub>34</sub> GBS SNP set (chr17:27130383). **(b)** As exemplified in this pair of LocusZoom plots,  
636 GBS SNPs defined the boundaries of the loci much more precisely than array SNPs. GBS  
637 SNPs that are in high LD ( $r_2 > 0.8$ , red dots) with lead SNP chr17:27130383 resides between 27  
638 ~ 28.2 Mb. In contrast, too few SNPs are present in the array plot to draw any definitive  
639 conclusion about the boundaries or LD pattern in this region. This locus has also been observed  
640 in GWAS for a variety of other traits, including locomotor activity, startle and prepulse inhibition  
641 [39] and open field test for anxiety [36]. LocusZoom plots for all loci identified in this paper are in  
642 Fig S7.

643

## 644 Supporting information

645

646 **S1 Fig. Autosomal heterozygosity distribution in  $F_{34}$ ,  $F_{39-43}$  AILs.** Animals with excessive or  
647 insufficient heterozygosity (3 *s.d.* away from mean) were removed from further analysis. As  
648 controls, we have sequenced two  $F_{2s}$  of LG and SM, four LG mice and four SM mice (see  
649 annotated data points with 1 and 0 heterozygosity).

650

651 **S2 Fig. Kinship coefficients in  $F_{34}$  and  $F_{39-43}$  AILs calculated from pedigree against genetic**  
652 **relatedness matrix calculated using IBDLD [49].** Each circle represents a pair of animals,  
653 which their genetic kinship relatedness on the x-axis and pedigree kinship relatedness on the y-  
654 axis. Color signifies relatedness based on AILL pedigree. Blue circles represent identical twins,  
655 red full siblings, yellow parent-offspring pairs, grey other relationships. Seven animal pairs that  
656 deviate from the pedigree relationship clusters were excluded (see black arrows).

657

658 **S3 Fig. Heatmap showing  $F_{34}$  array and  $F_{34}$  GBS genotype concordance in percentages,**  
659 **using 66 shared SNPs.** “A” codes for the LG/J allele, and “B” codes for the SM/J allele. “AA”  
660 genotype concordance between array and GBS is 24.54%, “AB” 43.23%, “BB” 27.60%.

661

662 **S4 Fig. LD decay in  $F_{34}$  array,  $F_{34}$  GBS,  $F_{39-43}$  GBS, and  $F_{34}$  and  $F_{39-43}$  GBS SNP sets.**

663

664 **S5 Fig. Manhattan plots comparing 4,593  $F_{34}$  array, 60.3K  $F_{34}$  GBS, 4.3M imputed  $F_{34}$  array,**  
665 **and 4.1M imputed  $F_{34}$  GBS (N=428) SNPs on day 2 locomotor activity.** Adjusted significance  
666 thresholds for imputed array and GBS SNPs were estimated using LD pruned SNPs ( $r^2=0.1$ ,  
667 window size=20kb; PLINK v1.9). Notice that even though the imputed sets have more SNPs  
668 (the two right panels), they are frequently blocks of many SNPs with almost identical position  
669 and LD=1, therefore making it hard to visualize the additional SNPs.

670

671 **S6 Fig. SNP heritability using  $F_{34}$  GBS and  $F_{34}$  array SNPs (slope=1).**

672

673 **S7 Fig. LocusZoom for  $F_{34}$  array,  $F_{34}$  GBS,  $F_{39-43}$  GBS, and mega-analysis QTLs.**

674

675 **S1 Table. List of phenotypes used in GWAS.**

676

677 **S2 Table. SNP and individual QC filter table.** Numbers of animals and SNPs remained after  
678 each step of filtering are shown per GBS SNP set.

679

680 **S3 Table. Effect of PLINK v1.9 clump-based pruning parameters on number of**  
681 **independent SNPs remained.** At all  $r_2$  values examined, a sliding window size of 12150kb was  
682 the first smallest window that yield the most stringent number of clumped SNPs in both array  
683 and GBS GWAS.

684

685 **S4 Table. Lead QTL in  $F_{34}$  GBS and  $F_{34}$  array GWAS studies across phenotypes.**  
686 Significant SNPs are clumped using parameters  $r_2=0.1$ , 12150kb.

687

688 **S5 Table.  $F_{34}$  GBS and array SNP heritability estimates.**

689

690 **S6 Table.  $F_{34}$  and  $F_{39-43}$  genetic correlations in locomotor activity, coat color, and body**  
691 **weight.**

692

693 **S7 Table. SNP-heritability comparison between  $F_{34}$  and  $F_{39-43}$  GBS.**

694  
695 **S8 Table. Lead QTL in F<sub>39-43</sub> N=600 GBS GWAS studies across phenotypes.** Significant  
696 SNPs are clumped using parameters  $r_2=0.1$ , 12150kb.  
697  
698 **S9 Table. Lead QTL in F<sub>34</sub> and F<sub>39-43</sub> (N=1028) mega-analysis across phenotypes.**  
699 Significant SNPs are clumped using parameters  $r_2=0.1$ , 12150kb.  
700  
701 **S10 Table. SNPs in F<sub>34</sub> GBS set with HWE p-values close to  $1.0 \times 10^{-6}$  cutoff threshold.**  
702 These SNPs are removed from QTL summary tables.  
703  
704 **S11 Table. SNPs in F<sub>34</sub> and F<sub>39-43</sub> mega-analysis GBS set with HWE p values close to**  
705  **$1.0 \times 10^{-6}$  cutoff threshold.** These SNPs are removed from QTL summary tables.  
706  
707 **S12 Table. Adjusted significance threshold for each SNP set and GWAS cohort.**

# MAF Distributions

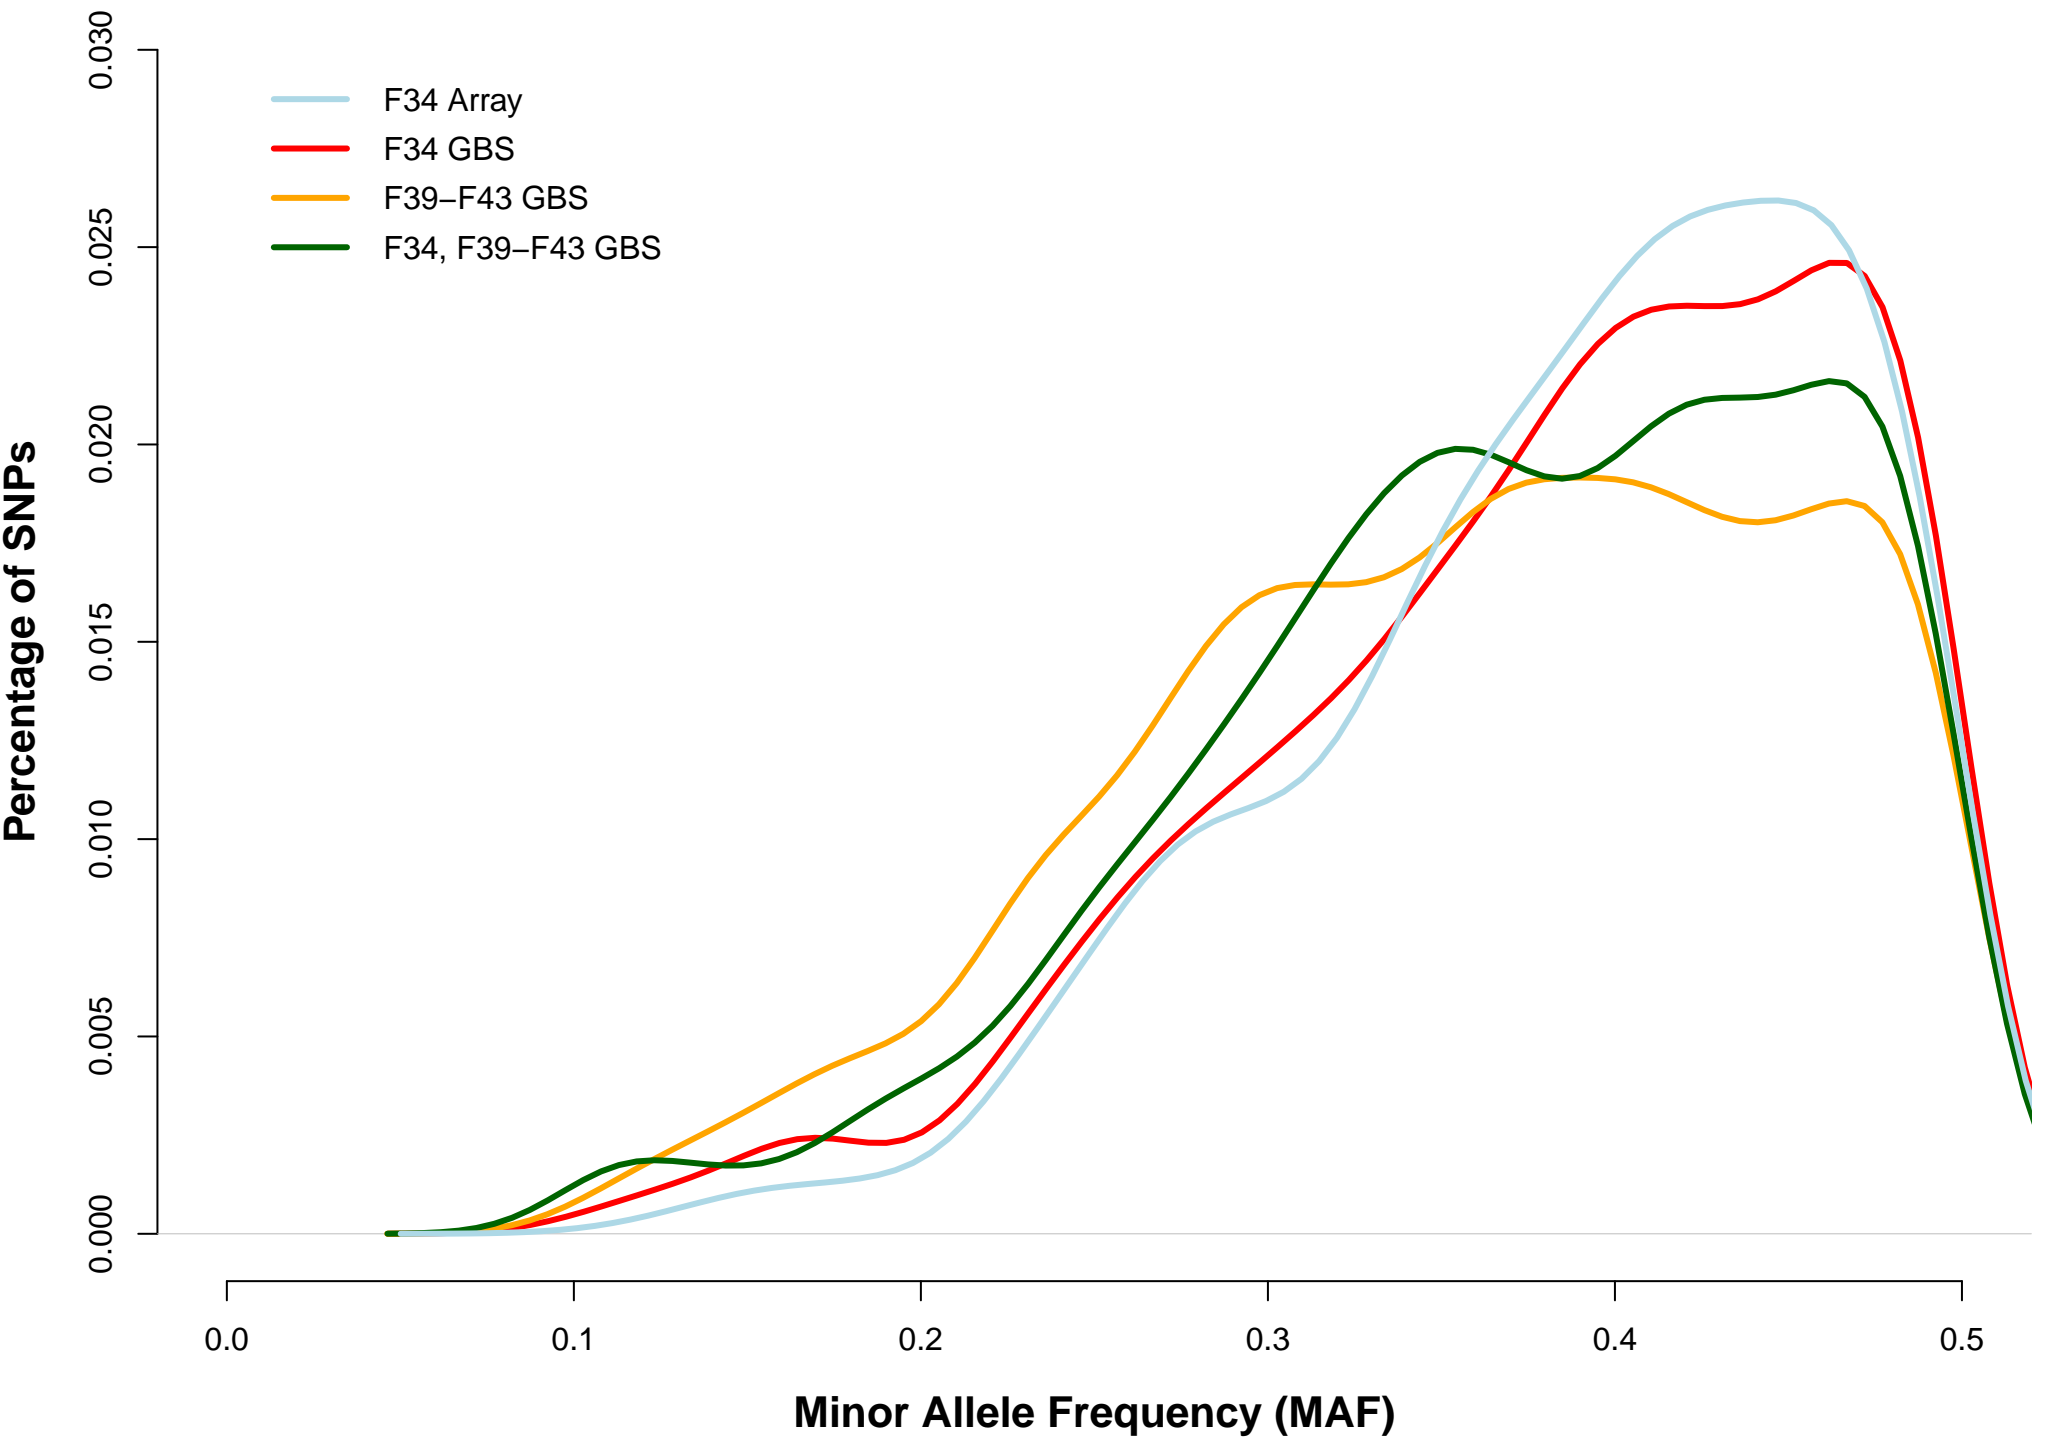

# Phenotype

bioRxiv preprint doi: <https://doi.org/10.1101/387613>; this version posted August 8, 2018. The copyright holder for this preprint (which was not certified by peer review) is the author/funder, who has granted bioRxiv a license to display the preprint in perpetuity. It is made available under aCC-BY 4.0 International license.

## Locomotor day 1, quantile normalized

F34

F39-43

## Locomotor day 2, quantile normalized

F34

F39-43

## Locomotor day 3, quantile normalized

F34

F39-43

## Coat color, albino

F34

F39-43

## Coat color, agouti

F34

F39-43

## Body weight

F34

F39-43

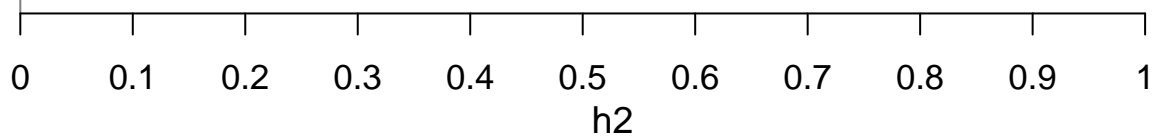



F<sub>34</sub> GBS, locomotor activity day 1 (N=428)

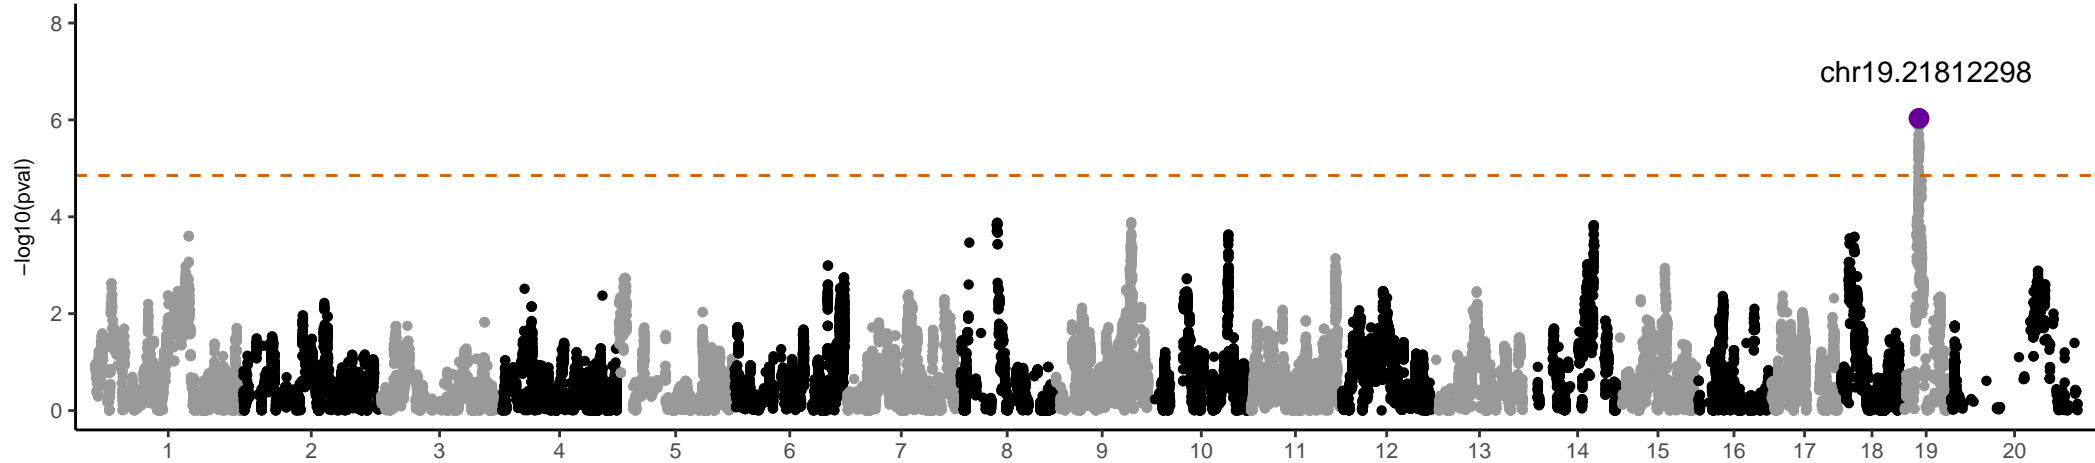

F<sub>39-43</sub> GBS, locomotor activity day 1 (N=600)

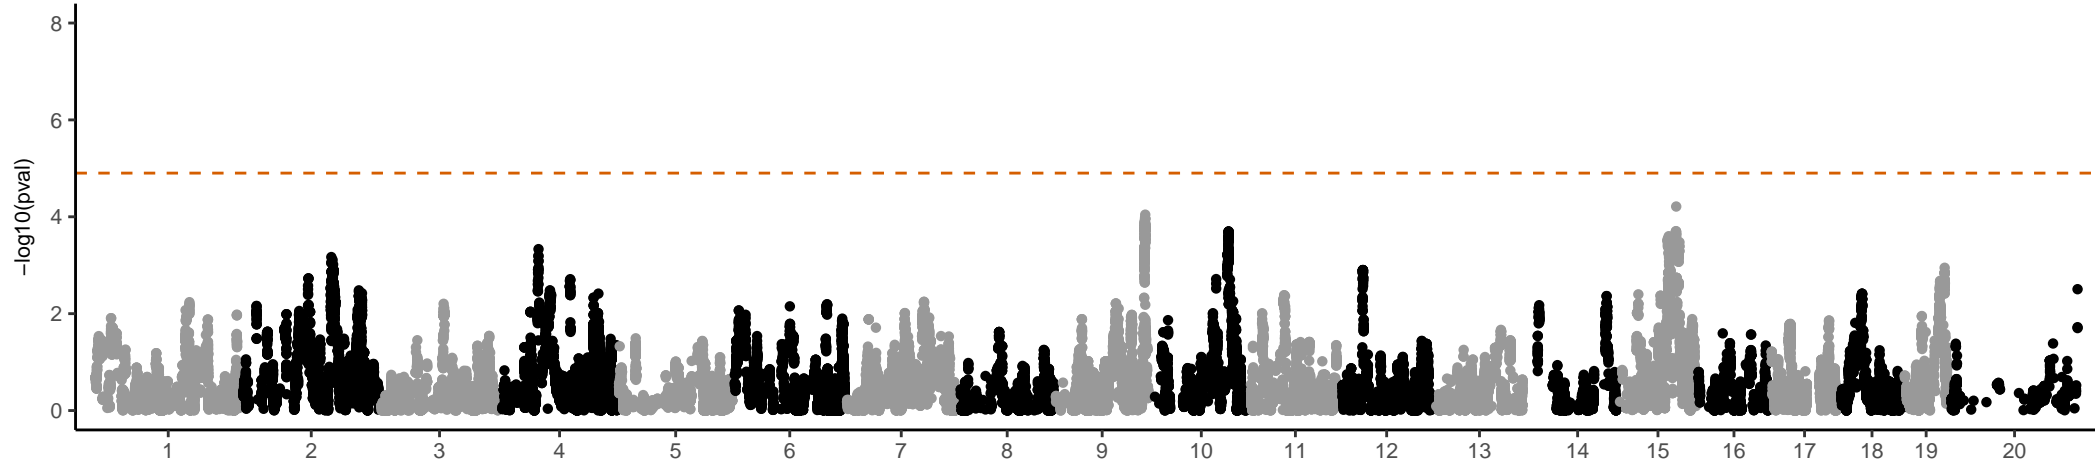

Mega analysis, locomotor activity day 1 (N=1028)

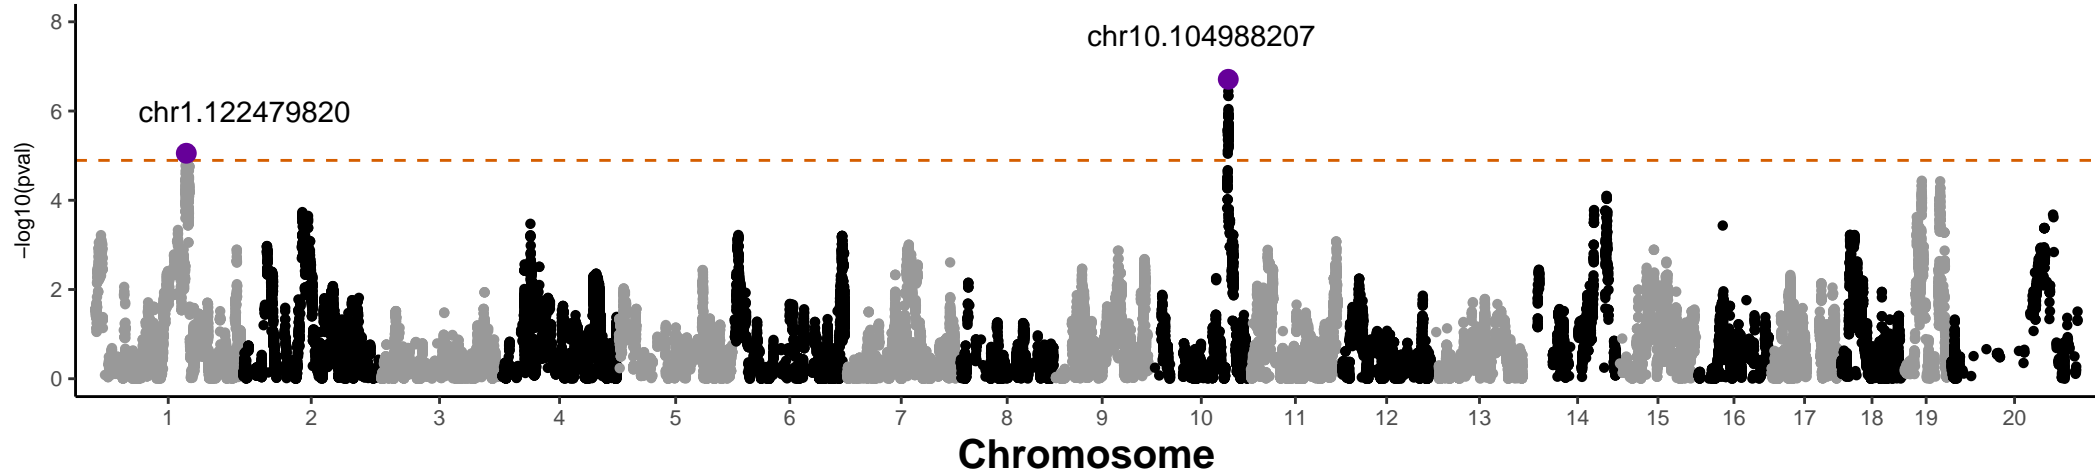

**a**

F<sub>34</sub> array open filed, distance traveled in periphery  
 bioRxiv preprint doi: <https://doi.org/10.1101/387813>; this version posted August 8, 2018. The copyright holder for this preprint (which was not certified by peer review) is the author/funder, who has granted bioRxiv a license to display the preprint in perpetuity. It is made available under aCC-BY 4.0 International license.

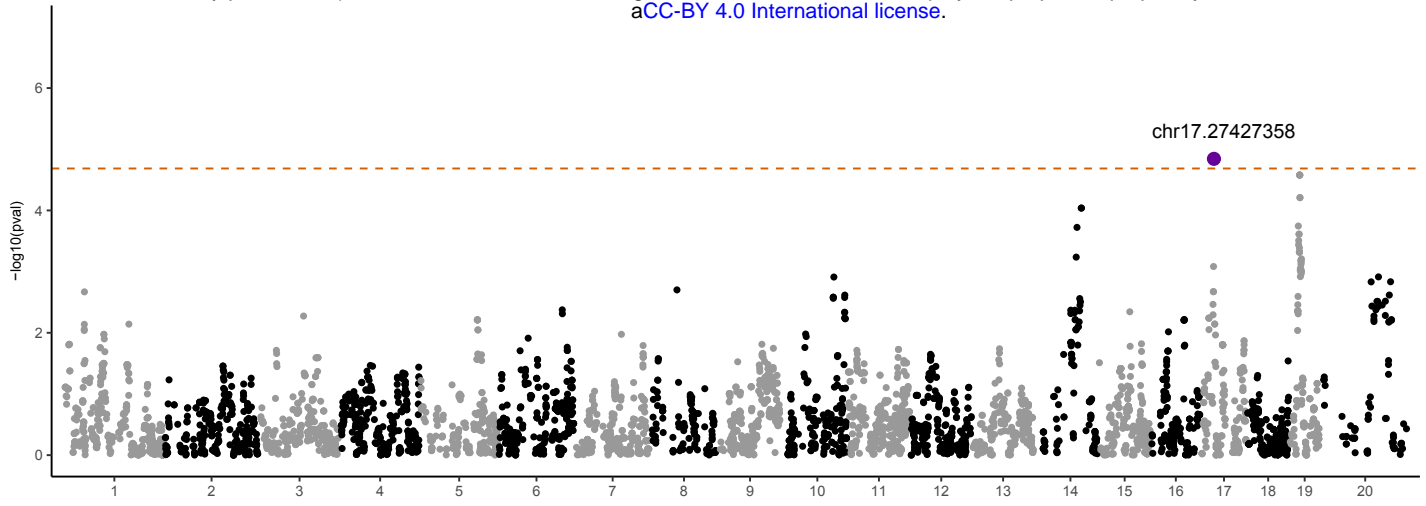

F<sub>34</sub> GBS, open filed, distance traveled in periphery

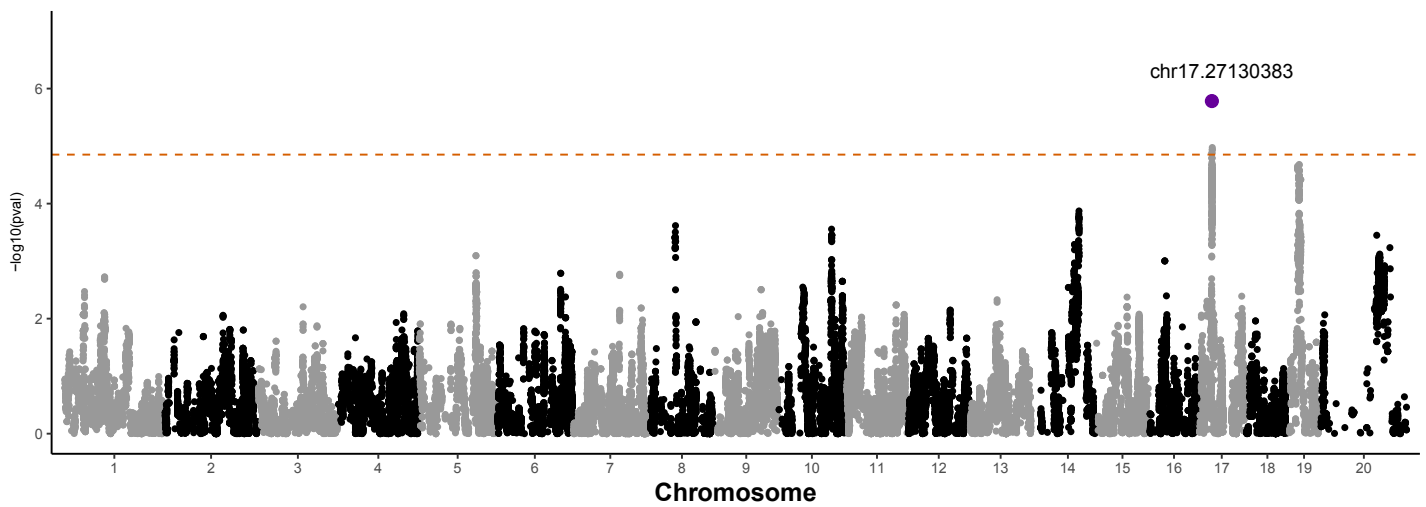**b**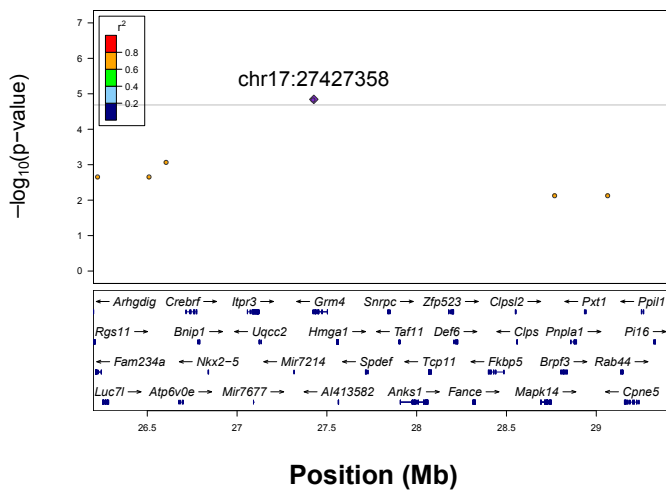

46 genes  
omitted

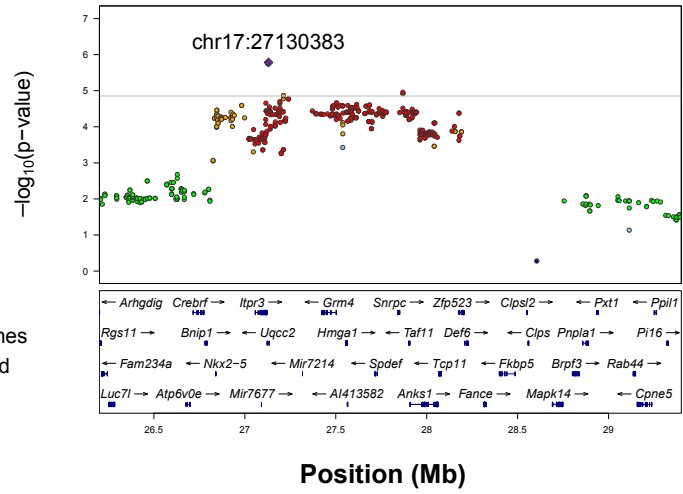

46 genes  
omitted
